# Supplementary material for: scTELL: A Single-Cell ATAC-seq Tool for Locus-Specific Transposable Element Identification in Chromatin Accessibility
Source: Research Square preprint supplement (doi:10.21203/rs.3.rs-6574738/v1), 2025-05-09
Supplement: Supplementary file 1 [file 47b181c98b9d804f9deb9c25.xlsx]

## Sheet: Table S1
Table S1. Standardized cell type nomenclature for systematic comparison between the discovery and validation sets in the ccRCC analysis, showing corresponding cell types from each dataset
Cell type annotaions within Discovery set	Cell type annotaions within Validation set
B cells	B_cell
ccRCC	ccRCC
Exhau-Pro CD8+ T	CD8_T_cell
Endothelial cells	Endothelium
TAM	Macrophage
Mast cells	Mast_cell
CAF	Mesangial_cell
Monocytes	Monocyte
Neutrophil	Neutrophil
NK cells	NK_cell
CD4+ T cells	T_cell

## Sheet: Table S2
Table S2. Details of the 25 primary tumor samples from the Human Tumor Atlas Network (HTAN) used in the breast cancer (BRCA) scATAC-seq analysis, including biospecimen information, HTAN data file ID, organ, and atlas name.
Biospecimen	HTAN Data File ID	Organ	Atlas Name
HTA12_118_1	HTA12_118_4001	Breast NOS	HTAN WUSTL
HTA12_119_1	HTA12_119_4001	Breast NOS	HTAN WUSTL
HTA12_120_1	HTA12_120_4003	Breast NOS	HTAN WUSTL
HTA12_120_2	HTA12_120_4004	Breast NOS	HTAN WUSTL
HTA12_243_3	HTA12_243_4005	Upper-outer quadrant of breast	HTAN WUSTL
HTA12_123_1	HTA12_123_4002	Breast NOS	HTAN WUSTL
HTA12_124_1	HTA12_124_4001	Breast NOS	HTAN WUSTL
HTA12_125_1	HTA12_125_4000	Breast NOS	HTAN WUSTL
HTA12_126_1	HTA12_126_4001	Breast NOS	HTAN WUSTL
HTA12_127_1	HTA12_127_4003	Breast NOS	HTAN WUSTL
HTA12_129_1	HTA12_129_4001	Breast NOS	HTAN WUSTL
HTA12_130_1	HTA12_130_4001	Breast NOS	HTAN WUSTL
HTA12_131_1	HTA12_131_4001	Breast NOS	HTAN WUSTL
HTA12_134_1	HTA12_134_4001	Breast NOS	HTAN WUSTL
HTA12_135_1	HTA12_135_4001	Breast NOS	HTAN WUSTL
HTA12_139_1	HTA12_139_4001	Breast NOS	HTAN WUSTL
HTA12_142_1	HTA12_142_4001	Breast NOS	HTAN WUSTL
HTA12_144_1	HTA12_144_4001	Breast NOS	HTAN WUSTL
HTA12_145_1	HTA12_145_4001	Breast NOS	HTAN WUSTL
HTA12_248_13	HTA12_248_4001	Overlapping lesion of breast	HTAN WUSTL
HTA12_249_6	HTA12_249_4001	Upper-outer quadrant of breast	HTAN WUSTL
HTA12_250_6	HTA12_250_4001	Overlapping lesion of breast	HTAN WUSTL
HTA12_251_3	HTA12_251_4001	Upper-inner quadrant of breast	HTAN WUSTL
HTA12_252_2	HTA12_252_4001	Upper-outer quadrant of breast	HTAN WUSTL
HTA12_149_4	HTA12_149_4001	Breast NOS	HTAN WUSTL

## Sheet: Table S3
Table S3. Transposable element (TE) families and their corresponding elements selected for analysis in the cancer studies (BRCA and ccRCC), focusing on potentially active elements meeting specified length criteria.
TE Family	Elements	Description
L1	L1HS, L1PA2-8A, L1PA10-17	Young L1 elements (L1HS) and their primate-specific subfamilies (L1PA), filtered for full-length elements (>5kb)
SVA	SVA_A, SVA_B, SVA_C, SVA_D, SVA_E, SVA_F	Complete set of hominid-specific SVA retrotransposons, filtered for elements >700bp
HERVK	HERVK-int, HERVK3/9/11/13/14/22-int, HERVK11D-int, HERVK14C-int	Intact internal sequences of HERVK family endogenous retroviruses, filtered for elements >5kb
